# Supplementary material
Source: publisher site journal article supplement (https://www.spandidos-publications.com/1026/downloadSupplementary)

Figure S1. Whole blot image of the western blot analysis of *GLS1* in siR-GLS1-treated CRC cells. C, control; si, small interfering; CRC, colorectal cancer.

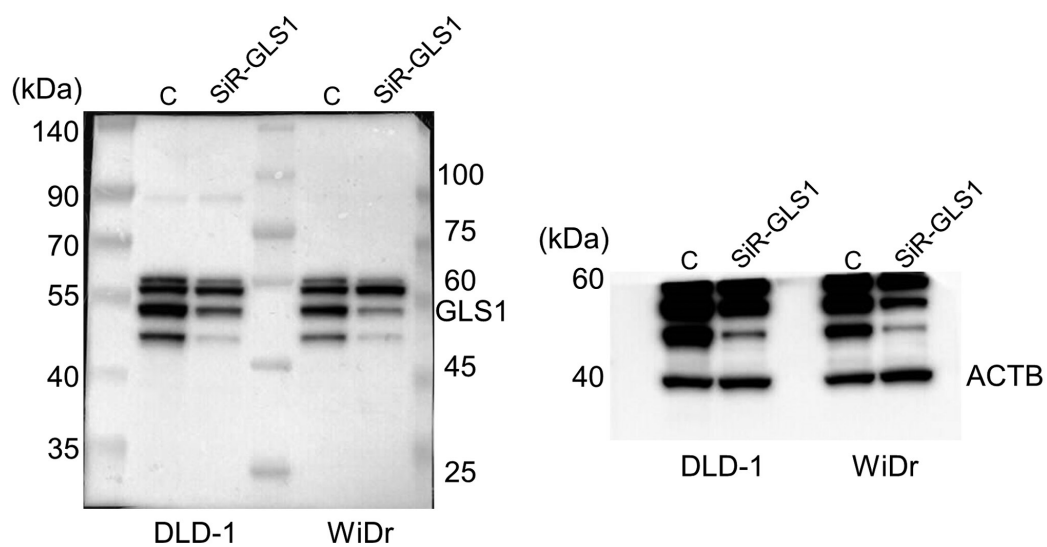

Supplement: Supplementary file 1 [file downloadSupplementary]
